# Supplementary material for: Spatially Resolved Source Apportionment of Industrial VOCs Using a Mobile Monitoring Platform
Source: MDPI journal article supplement (doi:10.3390/atmos13101722), 2022-10-20
Supplement: s1 [file s1]

Archive with 1 entries (1 files):
- atmosphere-1941665-supplementary.pdf
