# Supplementary material for: Spatially Resolved Source Apportionment of Industrial VOCs Using a Mobile Monitoring Platform
Source: MDPI journal article supplement (doi:10.3390/atmos13101722), 2022-10-20
Supplement: s1 [file s1 › atmosphere-1941665-supplementary.pdf]

# Supplementary Materials:

Robert M. Healy <sup>1,\*</sup>, Uwayemi M. Sofowote <sup>1</sup>, Jonathan M. Wang <sup>1</sup>, Qingfeng Chen<sup>1</sup> and Aaron Todd <sup>1</sup>

<sup>1</sup> Environmental Monitoring and Reporting Branch, Ontario Ministry of the Environment Conservation and Parks, Toronto, ON M9P 3V6, Canada

\* Correspondence: robert.healy@ontario.ca.

## MECP mobile monitoring platform:

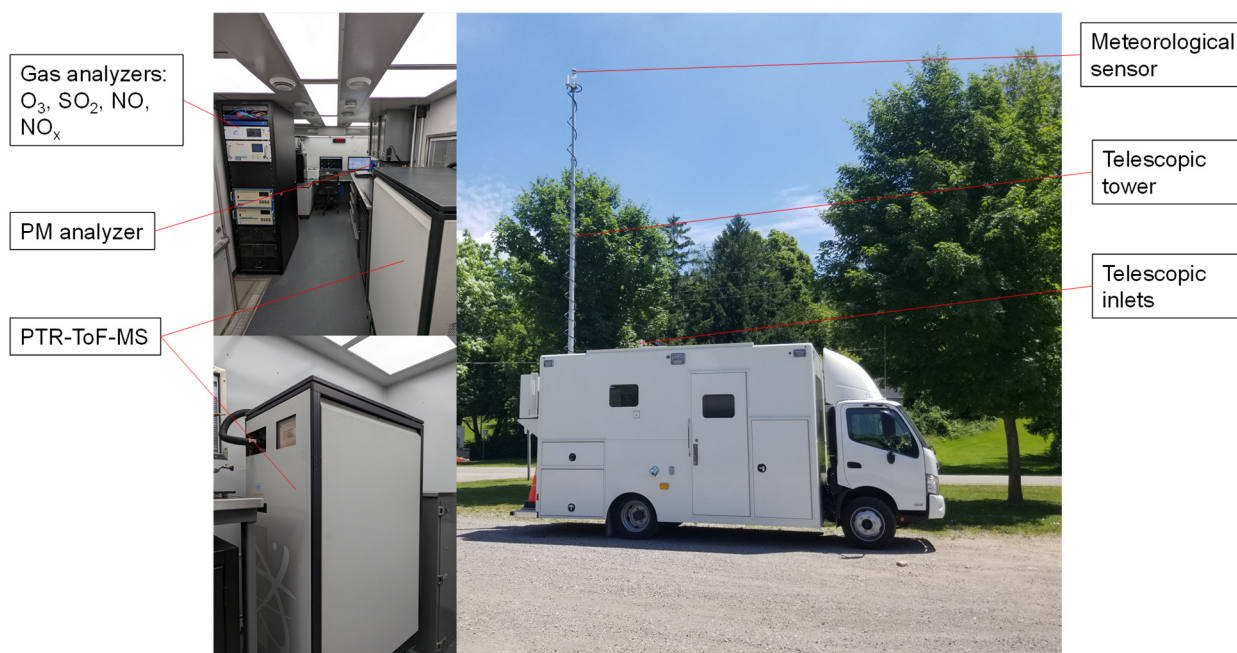

**Figure S1.** MECP mobile monitoring platform interior and exterior.

## PMF Analysis and Optimization:

Factor solutions (FS) featuring four to eight factors were obtained from the base PMF analyses. Table S1, S2 and S3 show the input data summary statistics, the fits from the base results and the scaled residuals beyond 3 standard deviations, respectively. The results indicated that the seven-factor solution (7FS) and the eight-factor solution (8FS) were similar in terms of their performance metrics:  $Q$ , scaled residuals (range: 3–4) and  $Q/Q_{\text{exp}}$ . Figure S2 shows a plot of the reduction in  $Q$  with each successive factor obtained. The percent decrease in  $Q$  moving from a 7FS to an 8FS compared to previous decreases was not considered to be large enough to justify using an 8FS. Furthermore, the 8FS extracted a  $m/z$  105-dominated factor (styrene), but the modelling fit was poor and therefore this extra factor was not considered to be physically meaningful. Thus, the 7FS was deemed to be optimal.  $Q/Q_{\text{exp}}$  for the factor profiles and the summed contributions for the base 7FS were  $<0.6$  and  $<2.5$ , respectively, as shown in Figure S3.

**Table S1.** PMF input statistics for the retained zero-background subtracted ions (ncps units).

| Species | Category | S/N   | Min     | 25th    | Median  | 75th    | Max      | %<br>Modeled<br>Samples | % Raw<br>Samples |
|---------|----------|-------|---------|---------|---------|---------|----------|-------------------------|------------------|
| m31     | 0 Weak   | 0.205 | -13.079 | 13.296  | 18.566  | 23.841  | 158.543  | 99.56 %                 | 100.00 %         |
| m33     | 0 Strong | 4.427 | 88.968  | 191.515 | 221.180 | 280.723 | 2573.377 | 99.56 %                 | 100.00 %         |
| m40     | 0 Strong | 3.466 | 3.936   | 40.821  | 68.528  | 94.208  | 258.622  | 99.56 %                 | 100.00 %         |
| m41     | 0 Strong | 3.010 | 5.199   | 44.688  | 58.936  | 86.746  | 1132.921 | 99.56 %                 | 100.00 %         |
| m42     | 0 Weak   | 2.518 | 2.101   | 25.091  | 33.950  | 62.571  | 782.718  | 99.56 %                 | 100.00 %         |
| m43     | 0 Strong | 1.683 | -13.400 | 21.622  | 38.096  | 66.931  | 559.454  | 99.56 %                 | 100.00 %         |
| m44     | 0 Weak   | 0.183 | -2.783  | 6.649   | 9.944   | 14.314  | 45.453   | 99.56 %                 | 100.00 %         |
| m45     | 0 Strong | 0.277 | -40.258 | -15.691 | -1.573  | 13.166  | 288.960  | 99.56 %                 | 100.00 %         |
| m46     | 0 Weak   | 0.227 | -14.535 | 2.083   | 10.190  | 16.724  | 98.778   | 99.56 %                 | 100.00 %         |
| m48     | 0 Weak   | 0.067 | -3.769  | 3.443   | 5.628   | 8.424   | 24.402   | 99.56 %                 | 100.00 %         |
| m50     | 0 Weak   | 0.004 | -12.874 | -0.996  | 2.166   | 5.571   | 42.919   | 99.56 %                 | 100.00 %         |
| m51     | 0 Strong | 0.266 | -1.810  | 4.749   | 7.598   | 11.811  | 102.604  | 99.56 %                 | 100.00 %         |
| m53     | 0 Weak   | 0.074 | -3.593  | 3.230   | 4.866   | 6.869   | 136.297  | 99.56 %                 | 100.00 %         |
| m54     | 0 Weak   | 0.041 | -4.081  | 2.143   | 3.773   | 5.681   | 126.059  | 99.56 %                 | 100.00 %         |
| m57     | 0 Strong | 3.673 | 8.139   | 42.115  | 53.755  | 77.690  | 2935.156 | 99.56 %                 | 100.00 %         |
| m58     | 0 Weak   | 0.184 | -2.442  | 4.798   | 6.902   | 9.494   | 160.081  | 99.56 %                 | 100.00 %         |
| m59     | 0 Strong | 9.185 | 73.992  | 173.803 | 195.943 | 221.692 | 2153.201 | 99.56 %                 | 100.00 %         |
| m60     | 0 Weak   | 0.064 | -6.720  | 2.989   | 5.421   | 8.109   | 88.890   | 99.56 %                 | 100.00 %         |
| m63     | 0 Weak   | 0.097 | 0.059   | 5.436   | 6.915   | 8.698   | 19.183   | 99.56 %                 | 100.00 %         |
| m69     | 0 Strong | 0.567 | 1.044   | 9.393   | 12.320  | 17.411  | 150.810  | 99.56 %                 | 100.00 %         |
| m70     | 0 Weak   | 0.051 | -1.616  | 3.334   | 4.751   | 6.460   | 38.910   | 99.56 %                 | 100.00 %         |
| m71     | 0 Strong | 0.499 | -4.666  | 5.663   | 10.202  | 15.669  | 164.510  | 99.56 %                 | 100.00 %         |
| m73     | 0 Strong | 1.007 | -3.728  | 7.344   | 12.206  | 22.049  | 2785.223 | 99.56 %                 | 100.00 %         |
| m74     | 0 Weak   | 0.069 | -4.129  | 0.890   | 2.347   | 4.102   | 149.662  | 99.56 %                 | 100.00 %         |
| m75     | 0 Weak   | 0.168 | -8.463  | 0.383   | 3.187   | 9.210   | 266.126  | 99.56 %                 | 100.00 %         |
| m77     | 0 Strong | 0.979 | -3.318  | 6.120   | 11.089  | 17.710  | 153.907  | 99.56 %                 | 100.00 %         |
| m78     | 0 Strong | 1.083 | -2.359  | 2.855   | 4.732   | 15.490  | 343.674  | 99.56 %                 | 100.00 %         |
| m79     | 0 Strong | 4.715 | 0.094   | 13.528  | 36.628  | 327.927 | 6906.583 | 99.56 %                 | 100.00 %         |
| m80     | 0 Strong | 1.574 | -1.422  | 3.706   | 5.978   | 25.339  | 488.900  | 99.56 %                 | 100.00 %         |
| m81     | 0 Weak   | 0.175 | -1.595  | 4.385   | 6.250   | 8.803   | 48.502   | 99.56 %                 | 100.00 %         |
| m83     | 0 Weak   | 0.137 | -1.205  | 4.094   | 5.903   | 8.361   | 95.377   | 99.56 %                 | 100.00 %         |
| m85     | 0 Weak   | 0.092 | -1.785  | 3.009   | 4.662   | 6.902   | 106.536  | 99.56 %                 | 100.00 %         |
| m87     | 0 Weak   | 0.184 | -0.709  | 4.500   | 6.684   | 9.725   | 23.345   | 99.56 %                 | 100.00 %         |
| m89     | 0 Weak   | 0.038 | -4.224  | 0.120   | 1.598   | 3.495   | 145.068  | 99.56 %                 | 100.00 %         |
| m93     | 0 Strong | 1.346 | -1.759  | 6.279   | 10.424  | 19.889  | 763.808  | 99.56 %                 | 100.00 %         |
| m94     | 0 Weak   | 0.059 | -4.640  | 0.114   | 1.504   | 3.445   | 67.152   | 99.56 %                 | 100.00 %         |
| m96     | 0 Weak   | 0.141 | -1.630  | 4.819   | 6.666   | 8.269   | 17.699   | 99.56 %                 | 100.00 %         |
| m97     | 0 Weak   | 0.238 | 1.640   | 6.921   | 8.739   | 10.894  | 98.792   | 99.56 %                 | 100.00 %         |
| m98     | 0 Weak   | 0.118 | -0.338  | 4.511   | 5.929   | 7.240   | 14.699   | 99.56 %                 | 100.00 %         |
| m99     | 0 Weak   | 0.046 | -2.949  | 2.113   | 3.626   | 5.662   | 43.299   | 99.56 %                 | 100.00 %         |
| m101    | 0 Strong | 0.286 | 0.346   | 5.198   | 7.156   | 10.061  | 214.831  | 99.56 %                 | 100.00 %         |
| m105    | 0 Weak   | 0.429 | -3.809  | 1.260   | 3.241   | 6.403   | 628.896  | 99.56 %                 | 100.00 %         |
| m106    | 0 Weak   | 0.018 | -9.243  | -1.497  | -0.187  | 1.234   | 58.564   | 99.56 %                 | 100.00 %         |
| m107    | 0 Weak   | 1.954 | 4.505   | 11.666  | 14.794  | 23.036  | 999.739  | 99.56 %                 | 100.00 %         |
| m108    | 0 Weak   | 0.068 | -3.954  | 0.651   | 1.726   | 3.008   | 95.198   | 99.56 %                 | 100.00 %         |
| m109    | 0 Weak   | 0.040 | -7.780  | 0.884   | 3.482   | 7.004   | 28.034   | 99.56 %                 | 100.00 %         |
| m111    | 0 Weak   | 0.009 | -5.130  | -0.848  | 0.279   | 1.744   | 55.377   | 99.56 %                 | 100.00 %         |
| m115    | 0 Weak   | 0.085 | -4.032  | 0.407   | 2.265   | 5.118   | 69.094   | 99.56 %                 | 100.00 %         |
| m117    | 0 Weak   | 0.143 | 0.479   | 4.066   | 5.350   | 6.923   | 20.689   | 99.56 %                 | 100.00 %         |
| m121    | 0 Weak   | 0.366 | -1.194  | 3.210   | 4.828   | 7.695   | 194.790  | 99.56 %                 | 100.00 %         |
| m122    | 0 Weak   | 0.036 | -2.302  | 1.389   | 2.431   | 3.834   | 20.926   | 99.56 %                 | 100.00 %         |
| m124    | 0 Strong | 0.337 | -4.510  | 5.194   | 8.461   | 13.614  | 31.971   | 99.56 %                 | 100.00 %         |
| m125    | 0 Weak   | 0.007 | -3.383  | 0.250   | 1.249   | 2.503   | 26.642   | 99.56 %                 | 100.00 %         |
| m133    | 0 Weak   | 0.007 | -2.592  | 0.181   | 0.974   | 1.937   | 21.524   | 99.56 %                 | 100.00 %         |
| m135    | 0 Weak   | 0.100 | -2.712  | 1.165   | 2.193   | 3.756   | 79.873   | 99.56 %                 | 100.00 %         |

|      |   |      |       |        |        |        |       |        |         |          |
|------|---|------|-------|--------|--------|--------|-------|--------|---------|----------|
| m137 | 0 | Weak | 0.007 | -5.012 | -0.535 | 0.478  | 1.681 | 16.349 | 99.56 % | 100.00 % |
| m139 | 0 | Weak | 0.002 | -3.872 | -1.016 | -0.006 | 1.159 | 17.392 | 99.56 % | 100.00 % |
| m143 | 0 | Weak | 0.057 | -2.101 | 2.269  | 3.828  | 5.747 | 21.280 | 99.56 % | 100.00 % |
| m147 | 0 | Weak | 0.006 | -3.277 | -0.226 | 0.528  | 1.421 | 39.453 | 99.56 % | 100.00 % |
| m149 | 0 | Weak | 0.019 | -2.233 | 0.777  | 1.627  | 2.673 | 69.704 | 99.56 % | 100.00 % |
| m153 | 0 | Weak | 0.000 | -3.295 | -0.841 | -0.061 | 0.854 | 8.001  | 99.56 % | 100.00 % |
| m161 | 0 | Weak | 0.168 | -2.435 | 2.263  | 4.078  | 6.818 | 61.825 | 99.56 % | 100.00 % |

**Table S2.** Model fits for all ions used in the PMF analyses.

| Species | Intercept | Slope | SE    | r <sup>2</sup> | KS Test Stat | KS Test P Value |
|---------|-----------|-------|-------|----------------|--------------|-----------------|
| m31 0   | 4.81      | 0.73  | 5.53  | 0.67           | 0.03         | 5.31E-09        |
| m33 0   | 67.74     | 0.71  | 49.79 | 0.77           | 0.10         | 0               |
| m40 0   | 2.27      | 0.97  | 7.28  | 0.98           | 0.01         | 0.181874        |
| m41 0   | 6.99      | 0.89  | 11.01 | 0.95           | 0.08         | 0               |
| m42 0   | 27.81     | 0.32  | 19.79 | 0.28           | 0.17         | 0               |
| m43 0   | 6.20      | 0.85  | 15.68 | 0.84           | 0.04         | 2.01E-12        |
| m44 0   | 1.55      | 0.86  | 2.41  | 0.86           | 0.01         | 0.31            |
| m45 0   | 8.59      | 0.65  | 7.99  | 0.87           | 0.05         | 0               |
| m46 0   | 5.88      | 0.32  | 6.10  | 0.28           | 0.08         | 0               |
| m48 0   | 1.56      | 0.73  | 1.84  | 0.71           | 0.02         | 0.02            |
| m50 0   | 2.02      | 0.33  | 2.14  | 0.39           | 0.02         | 5.06E-04        |
| m51 0   | 1.85      | 0.78  | 2.22  | 0.83           | 0.02         | 2.69E-03        |
| m53 0   | 2.30      | 0.56  | 2.17  | 0.66           | 0.08         | 0               |
| m54 0   | 1.89      | 0.54  | 1.93  | 0.64           | 0.06         | 0               |
| m57 0   | 11.15     | 0.85  | 19.20 | 0.97           | 0.17         | 0               |
| m58 0   | 0.91      | 0.88  | 1.92  | 0.92           | 0.02         | 0.03            |
| m59 0   | 28.38     | 0.85  | 22.43 | 0.92           | 0.09         | 0               |
| m60 0   | 2.22      | 0.64  | 1.93  | 0.73           | 0.03         | 1.05E-07        |
| m63 0   | 2.45      | 0.64  | 1.53  | 0.54           | 0.01         | 0.39            |
| m69 0   | 5.62      | 0.57  | 3.11  | 0.64           | 0.05         | 0               |
| m70 0   | 1.61      | 0.66  | 1.21  | 0.64           | 0.01         | 0.52            |
| m71 0   | 2.86      | 0.72  | 3.62  | 0.75           | 0.03         | 1.49E-07        |
| m73 0   | 2.15      | 0.90  | 6.95  | 0.99           | 0.06         | 0               |
| m74 0   | 0.28      | 0.91  | 1.45  | 0.94           | 0.01         | 0.55            |
| m75 0   | 1.41      | 0.74  | 3.67  | 0.83           | 0.05         | 0               |
| m77 0   | 3.98      | 0.63  | 5.15  | 0.70           | 0.06         | 0               |
| m78 0   | 0.22      | 0.97  | 2.68  | 0.99           | 0.09         | 0               |
| m79 0   | -1.98     | 1.01  | 21.49 | 1.00           | 0.19         | 0               |
| m80 0   | -0.29     | 1.01  | 2.16  | 1.00           | 0.03         | 4.22E-05        |
| m81 0   | 1.68      | 0.74  | 1.88  | 0.73           | 0.04         | 9.04E-11        |
| m83 0   | 2.31      | 0.63  | 1.99  | 0.67           | 0.05         | 0               |
| m85 0   | 1.94      | 0.61  | 1.75  | 0.64           | 0.05         | 1.11E-16        |
| m87 0   | 1.69      | 0.75  | 1.69  | 0.73           | 0.02         | 0.01            |
| m89 0   | 0.92      | 0.57  | 2.08  | 0.59           | 0.06         | 0               |
| m93 0   | 0.38      | 0.97  | 7.03  | 0.97           | 0.17         | 0               |
| m94 0   | 0.64      | 0.82  | 1.42  | 0.87           | 0.01         | 0.12            |
| m96 0   | 3.53      | 0.45  | 1.22  | 0.46           | 0.01         | 0.28            |
| m97 0   | 3.34      | 0.62  | 1.94  | 0.57           | 0.03         | 1.54E-07        |
| m98 0   | 2.93      | 0.49  | 1.07  | 0.45           | 0.01         | 0.78            |
| m99 0   | 1.25      | 0.68  | 1.32  | 0.70           | 0.01         | 0.10            |
| m101 0  | 0.89      | 0.87  | 1.96  | 0.93           | 0.01         | 0.53            |
| m105 0  | 4.60      | 0.03  | 4.67  | 0.03           | 0.23         | 0               |
| m106 0  | 0.45      | 0.10  | 0.95  | 0.12           | 0.11         | 0               |
| m107 0  | 16.44     | 0.18  | 20.43 | 0.18           | 0.23         | 0               |
| m108 0  | 1.72      | 0.19  | 2.01  | 0.19           | 0.16         | 0               |

|        |      |      |      |      |      |          |
|--------|------|------|------|------|------|----------|
| m109 0 | 1.43 | 0.68 | 1.94 | 0.71 | 0.01 | 0.13     |
| m111 0 | 0.84 | 0.36 | 0.77 | 0.56 | 0.04 | 2.17E-11 |
| m115 0 | 0.70 | 0.77 | 2.43 | 0.74 | 0.04 | 4.74E-10 |
| m117 0 | 1.81 | 0.65 | 1.27 | 0.53 | 0.01 | 0.77     |
| m121 0 | 1.95 | 0.68 | 4.05 | 0.75 | 0.12 | 0        |
| m122 0 | 0.77 | 0.71 | 0.97 | 0.72 | 0.01 | 0.14     |
| m124 0 | 1.21 | 0.87 | 2.04 | 0.88 | 0.02 | 3.07E-04 |
| m125 0 | 0.68 | 0.53 | 0.88 | 0.57 | 0.02 | 0.04     |
| m133 0 | 0.60 | 0.46 | 0.73 | 0.49 | 0.02 | 9.53E-05 |
| m135 0 | 1.52 | 0.42 | 1.80 | 0.49 | 0.11 | 0        |
| m137 0 | 0.69 | 0.28 | 0.67 | 0.39 | 0.05 | 4.44E-16 |
| m139 0 | 0.63 | 0.29 | 0.41 | 0.58 | 0.02 | 1.17E-04 |
| m143 0 | 1.81 | 0.52 | 1.35 | 0.49 | 0.02 | 2.42E-03 |
| m147 0 | 0.57 | 0.28 | 0.60 | 0.36 | 0.04 | 5.71E-14 |
| m149 0 | 1.20 | 0.29 | 0.92 | 0.30 | 0.05 | 0        |
| m153 0 | 0.42 | 0.22 | 0.29 | 0.48 | 0.02 | 0.01     |
| m161 0 | 0.99 | 0.74 | 2.01 | 0.70 | 0.04 | 6.66E-15 |

**Table S3.** Scaled residuals beyond 3 standard deviations (dates by species).

| Species | Date Time  | Residuals |
|---------|------------|-----------|
| m33 0   | 18/06/2020 | 3.16      |
| m33 0   | 24/06/2020 | 3.253     |
| m105 0  | 16/06/2020 | 3.078     |
| m105 0  | 16/06/2020 | 3.058     |
| m107 0  | 16/06/2020 | 3.185     |
| m107 0  | 16/06/2020 | 3.112     |
| m107 0  | 16/06/2020 | 3.221     |
| m107 0  | 16/06/2020 | 3.122     |
| m107 0  | 16/06/2020 | 3.304     |
| m107 0  | 16/06/2020 | 3.316     |
| m107 0  | 16/06/2020 | 3.197     |
| m107 0  | 16/06/2020 | 3.188     |
| m107 0  | 16/06/2020 | 3.037     |
| m107 0  | 16/06/2020 | 3.058     |
| m107 0  | 16/06/2020 | 3.038     |
| m107 0  | 16/06/2020 | 3.291     |
| m107 0  | 16/06/2020 | 3.046     |
| m107 0  | 16/06/2020 | 3.092     |
| m107 0  | 16/06/2020 | 3.177     |

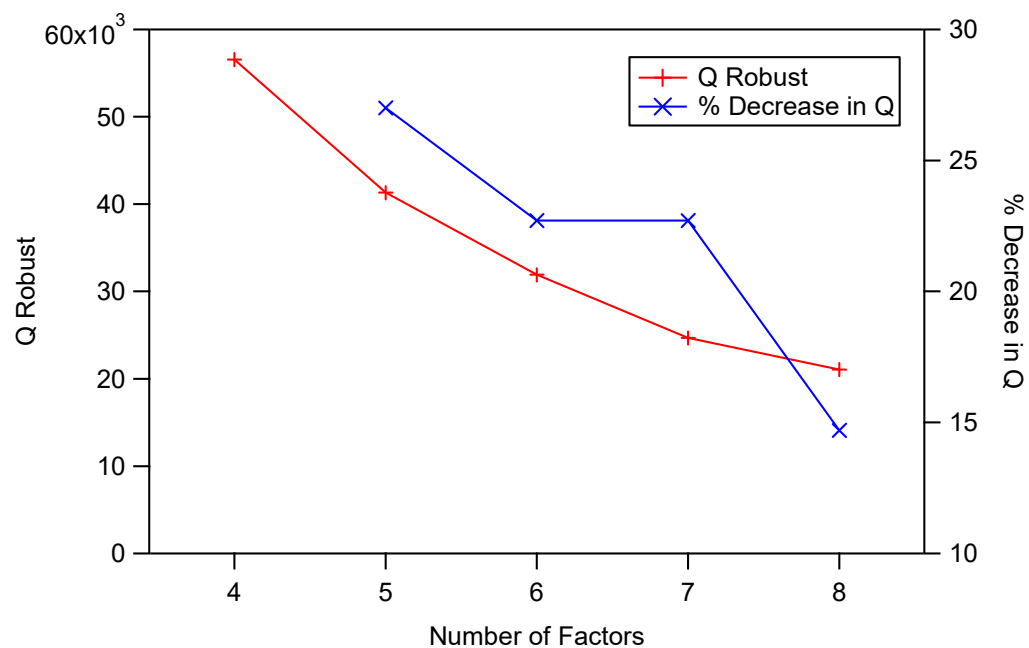

**Figure S2.** Reduction in Q with increasing factor number.

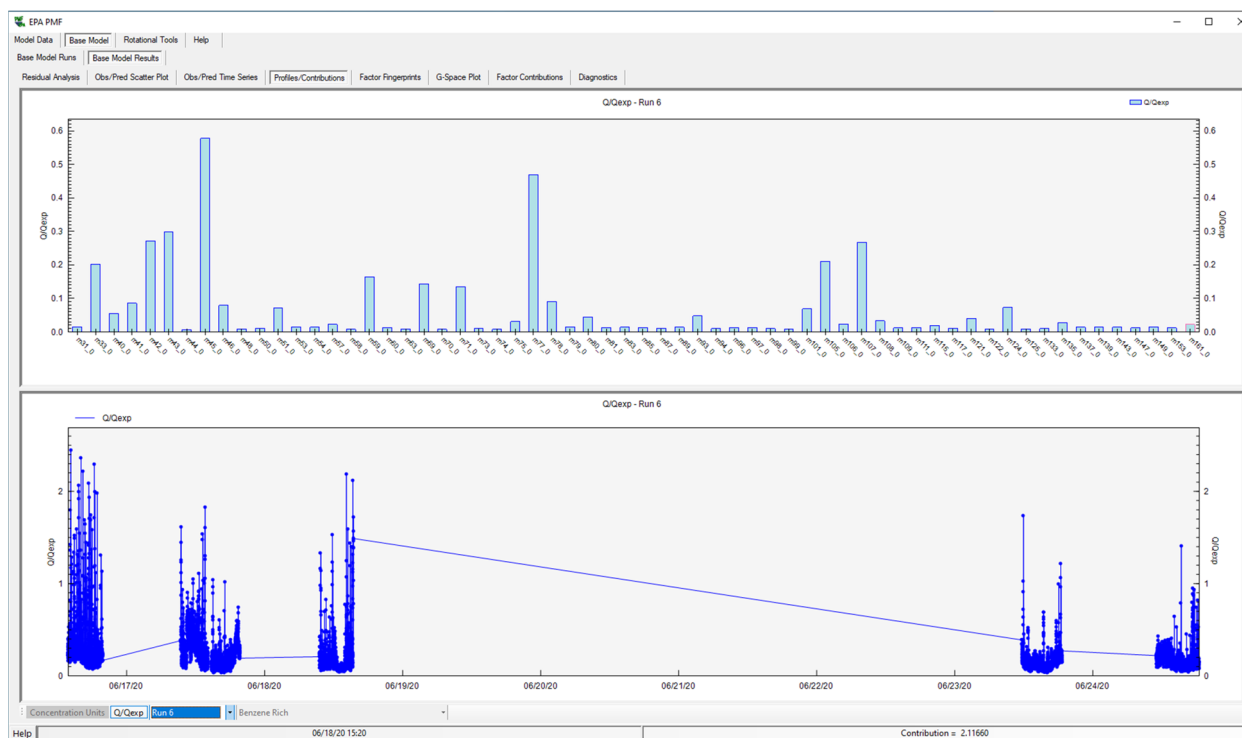

**Figure S3.**  $Q/Q_{\text{exp}}$  for the factor profiles (top) and their summed contributions to total ion counts (bottom) for the base seven-factor solution.

Further runs were initiated to assess the extent to which the base factor solutions were affected by random errors and rotational ambiguity both singly and jointly [1]. 100 bootstrap (BS) runs were initiated to assess the random errors. The results were satisfactory, i.e., all factors had at least 80% of their bootstrapped factors mapped to their base factors (Table S4). These bootstrap runs were then followed by a displacement run (DISP) and a hybrid BS-DISP to assess the extent of rotational ambiguity both singly and coupled

with random errors, respectively. While the DISP run was devoid of factor swaps at all  $dQ_{\max}$  levels, there were some swaps in the BS-DISP runs, the remedy for which was the application of constraints to the factor solution.

**Table S4.** Error estimation summary (BS, DISP, BS-DISP) for the base model. Note that factor swaps were present in the BS-DISP results.

|                            |                                                                           |          |          |          |          |          |          |          |
|----------------------------|---------------------------------------------------------------------------|----------|----------|----------|----------|----------|----------|----------|
| Time of run:               | 03/01/21 13:14                                                            |          |          |          |          |          |          |          |
| Concentration file:        | C:\Users\...\Rob's VOC PTR MS Data 2020\AVG_sarnia_15s Yemi Trim III.xlsx |          |          |          |          |          |          |          |
| Uncertainty file:          | C:\Users\...\Rob's VOC PTR MS Data 2020\ERR_sarnia_15s Yemi Trim III.xlsx |          |          |          |          |          |          |          |
| Configuration file:        | C:\Users\...\Rob's VOC PTR MS Data 2020\7 FS\7FS_SARNIA.cfg               |          |          |          |          |          |          |          |
| BS-DISP Displaced Species: |                                                                           |          |          |          |          |          |          |          |
| m33_0                      |                                                                           |          |          |          |          |          |          |          |
| m40_0                      |                                                                           |          |          |          |          |          |          |          |
| m57_0                      |                                                                           |          |          |          |          |          |          |          |
| m59_0                      |                                                                           |          |          |          |          |          |          |          |
| m79_0                      |                                                                           |          |          |          |          |          |          |          |
| DISP Displaced Species:    |                                                                           |          |          |          |          |          |          |          |
| m33_0                      |                                                                           |          |          |          |          |          |          |          |
| m40_0                      |                                                                           |          |          |          |          |          |          |          |
| m41_0                      |                                                                           |          |          |          |          |          |          |          |
| m43_0                      |                                                                           |          |          |          |          |          |          |          |
| m45_0                      |                                                                           |          |          |          |          |          |          |          |
| m51_0                      |                                                                           |          |          |          |          |          |          |          |
| m57_0                      |                                                                           |          |          |          |          |          |          |          |
| m59_0                      |                                                                           |          |          |          |          |          |          |          |
| m69_0                      |                                                                           |          |          |          |          |          |          |          |
| m71_0                      |                                                                           |          |          |          |          |          |          |          |
| m73_0                      |                                                                           |          |          |          |          |          |          |          |
| m77_0                      |                                                                           |          |          |          |          |          |          |          |
| m78_0                      |                                                                           |          |          |          |          |          |          |          |
| m79_0                      |                                                                           |          |          |          |          |          |          |          |
| m80_0                      |                                                                           |          |          |          |          |          |          |          |
| m93_0                      |                                                                           |          |          |          |          |          |          |          |
| m101_0                     |                                                                           |          |          |          |          |          |          |          |
| m124_0                     |                                                                           |          |          |          |          |          |          |          |
| BS-DISP Diagnostics:       |                                                                           |          |          |          |          |          |          |          |
| # of Cases Accepted:       | 81                                                                        |          |          |          |          |          |          |          |
| % of Cases Accepted:       | 81%                                                                       |          |          |          |          |          |          |          |
| Largest Decrease in Q:     | -44.87400055                                                              |          |          |          |          |          |          |          |
| %dQ:                       | -0.216708281                                                              |          |          |          |          |          |          |          |
| # of Decreases in Q:       | 1                                                                         |          |          |          |          |          |          |          |
| # of Swaps in Best Fit:    | 16                                                                        |          |          |          |          |          |          |          |
| # of Swaps in DISP:        | 2                                                                         |          |          |          |          |          |          |          |
| Swaps by Factor:           | 3                                                                         | 1        | 13       | 12       | 8        | 0        | 1        | 3        |
| DISP Diagnostics:          |                                                                           |          |          |          |          |          |          |          |
| Error Code:                | 0                                                                         |          |          |          |          |          |          |          |
| Largest Decrease in Q:     | -0.165000007                                                              |          |          |          |          |          |          |          |
| %dQ:                       | -0.000796828                                                              |          |          |          |          |          |          |          |
| Swaps by Factor:           | 0                                                                         | 0        | 0        | 0        | 0        | 0        | 0        | 0        |
| BS Mapping:                |                                                                           |          |          |          |          |          |          |          |
|                            | Factor 1                                                                  | Factor 2 | Factor 3 | Factor 4 | Factor 5 | Factor 6 | Factor 7 | Unmapped |

---

|               |     |     |    |    |    |     |    |   |
|---------------|-----|-----|----|----|----|-----|----|---|
| Boot Factor 1 | 100 | 0   | 0  | 0  | 0  | 0   | 0  | 0 |
| Boot Factor 2 | 0   | 100 | 0  | 0  | 0  | 0   | 0  | 0 |
| Boot Factor 3 | 0   | 6   | 88 | 1  | 0  | 3   | 0  | 2 |
| Boot Factor 4 | 0   | 6   | 0  | 93 | 0  | 1   | 0  | 0 |
| Boot Factor 5 | 0   | 15  | 0  | 0  | 82 | 2   | 0  | 1 |
| Boot Factor 6 | 0   | 0   | 0  | 0  | 0  | 100 | 0  | 0 |
| Boot Factor 7 | 0   | 2   | 0  | 1  | 0  | 0   | 97 | 0 |

---

Three constraints were developed and applied to the solution. As mentioned above,  $m/z$  105 had appeared as a distinct factor in the 8FS and was also characterized by an unexpectedly low contribution for the Petroleum factor in the base 7FS. A step-wise approach of constraining this variable was applied as discussed in Sofowote et al., (2015) [2], i.e., hard and unwanted rotations with their associated high increase in dQ values were examined for, followed by BS, DISP and BS-DISP, then subsequent adjustments to the number of constraints applied in that sequence. The initial explained variances (EV) of the  $m/z$  105 variable in the base 7FS were as follows: Background/Acetone Factor EV ~45%, Chemical Waste Factor EV ~20%, Petroleum Factor EV ~20% (unexpectedly low relative to the other aromatics). Thus, constraints were applied to pull  $m/z$  105 down maximally in both the Background/Acetone and Chemical Waste Factors, while pulling it up maximally in the Petroleum Factor (each with a maximum allowed %dQ absolute change of 0.5%). Applying these three constraints together resulted in swaps during the BS-DISP phase, indicating that new, unwanted rotations had occurred. The factor swaps persisted when the number of constraints was reduced from three to two. Not until only the most critical constraint (pulling up  $m/z$  105 in the Petroleum Factor) was singly applied did the factor swaps cease in the BS-DISP phase (Figure S4), with Petroleum then explaining a more realistic ~45% of the  $m/z$  105 variance in the constrained solution. Thus, the final constrained 7FS was used for source apportionment purposes.  $Q/Q_{\text{exp}}$  for the factor profiles and the summed contributions for the final constrained 7FS were <0.4 and <0.5, respectively, as shown in Figure S5. The overall apportionment results for the base and final constrained 7FS are shown in Figures S6-S8. A scatter plot of the modelling fit performance for the final constrained 7FS as assessed by the correlation of the modelled and observed sum of PTR-ToF-MS ion counts is shown in Figure S9.

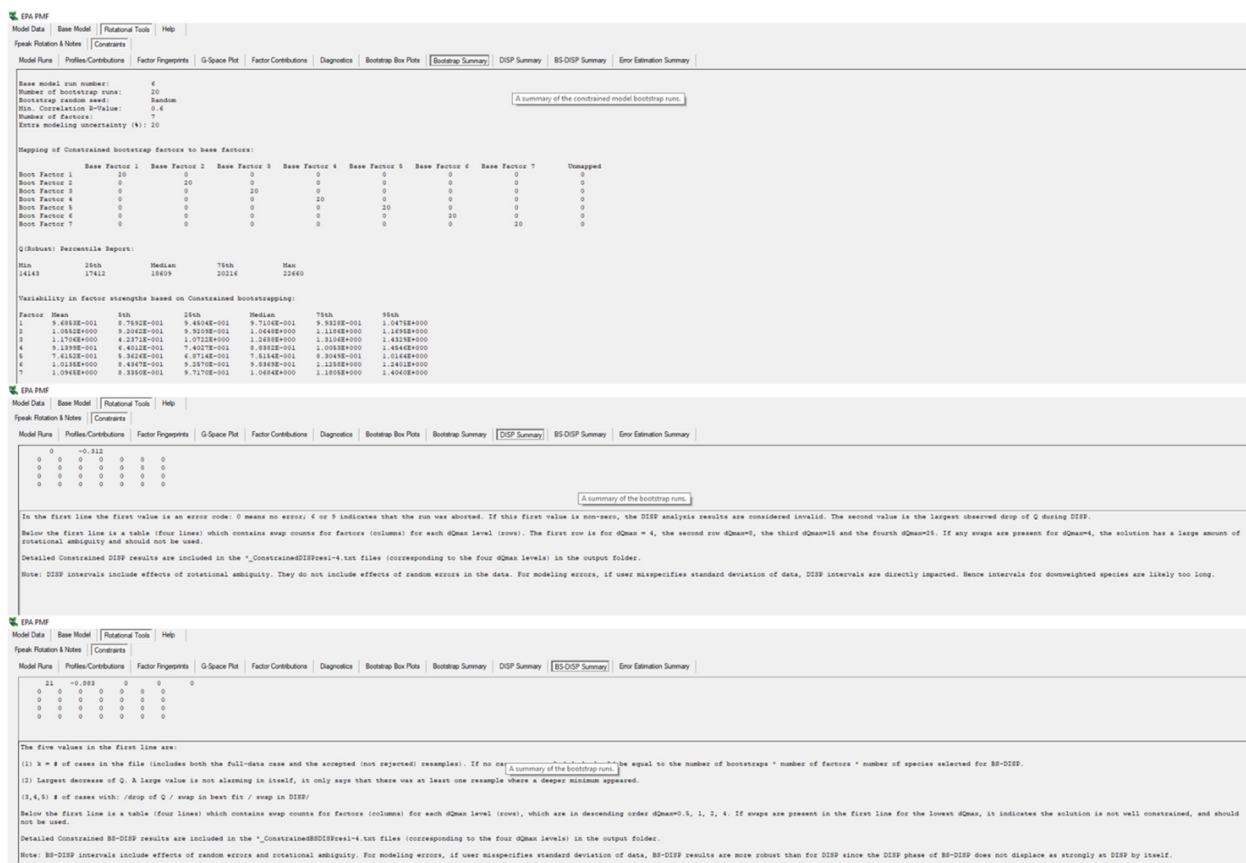

**Figure S4.** Stacked screenshots of the final constrained 7FS run showing no factor swaps in DISP and BS-DISP runs after the application of the final single constraint. .

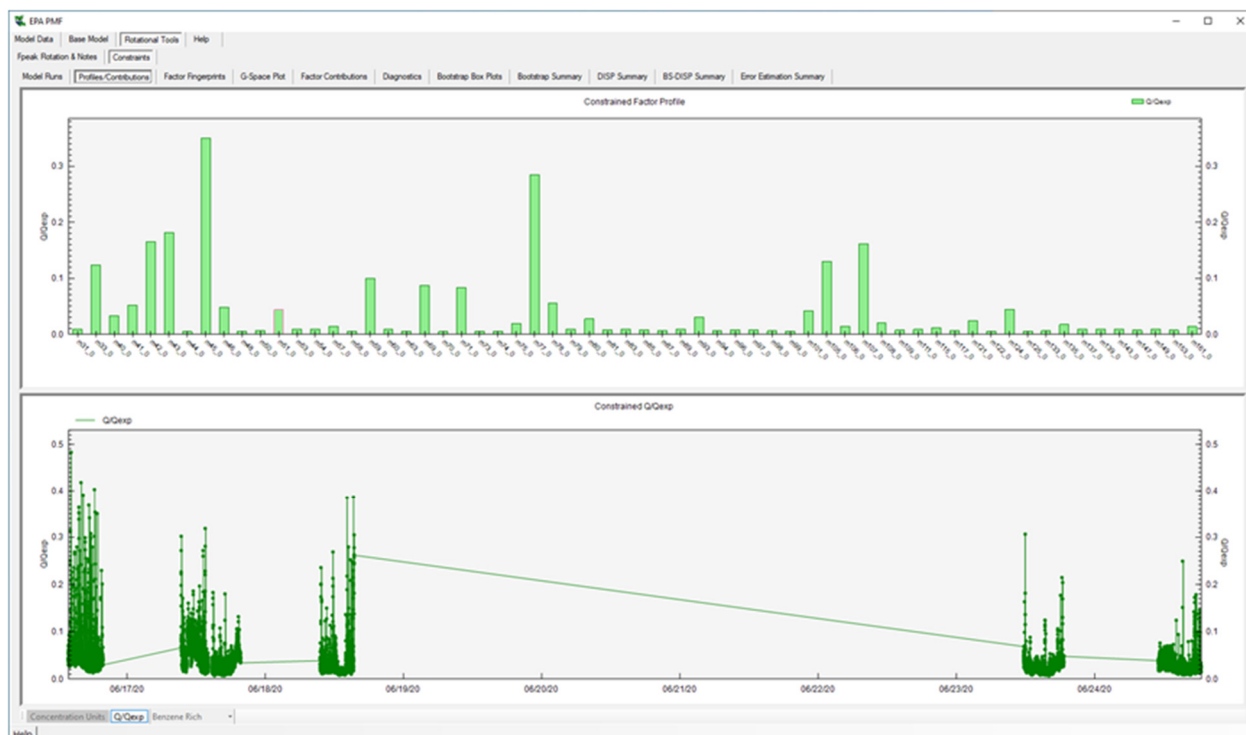

**Figure S5.** Q/Q<sub>exp</sub> for the factor profiles (top) and their summed contributions to total ion counts (bottom) for the final constrained seven-factor solution.

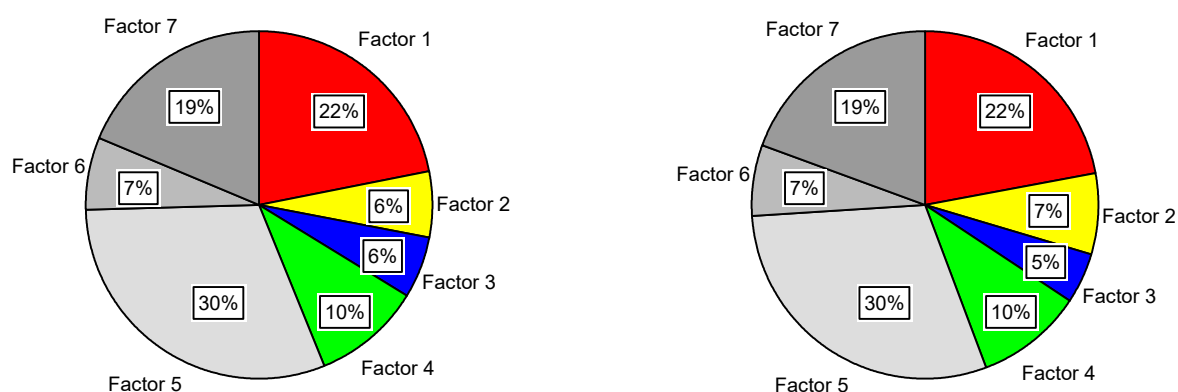

**Figure S6.** Average factor contributions to total ion counts (ncps) for the base (left) and constrained (right) seven-factor solutions.

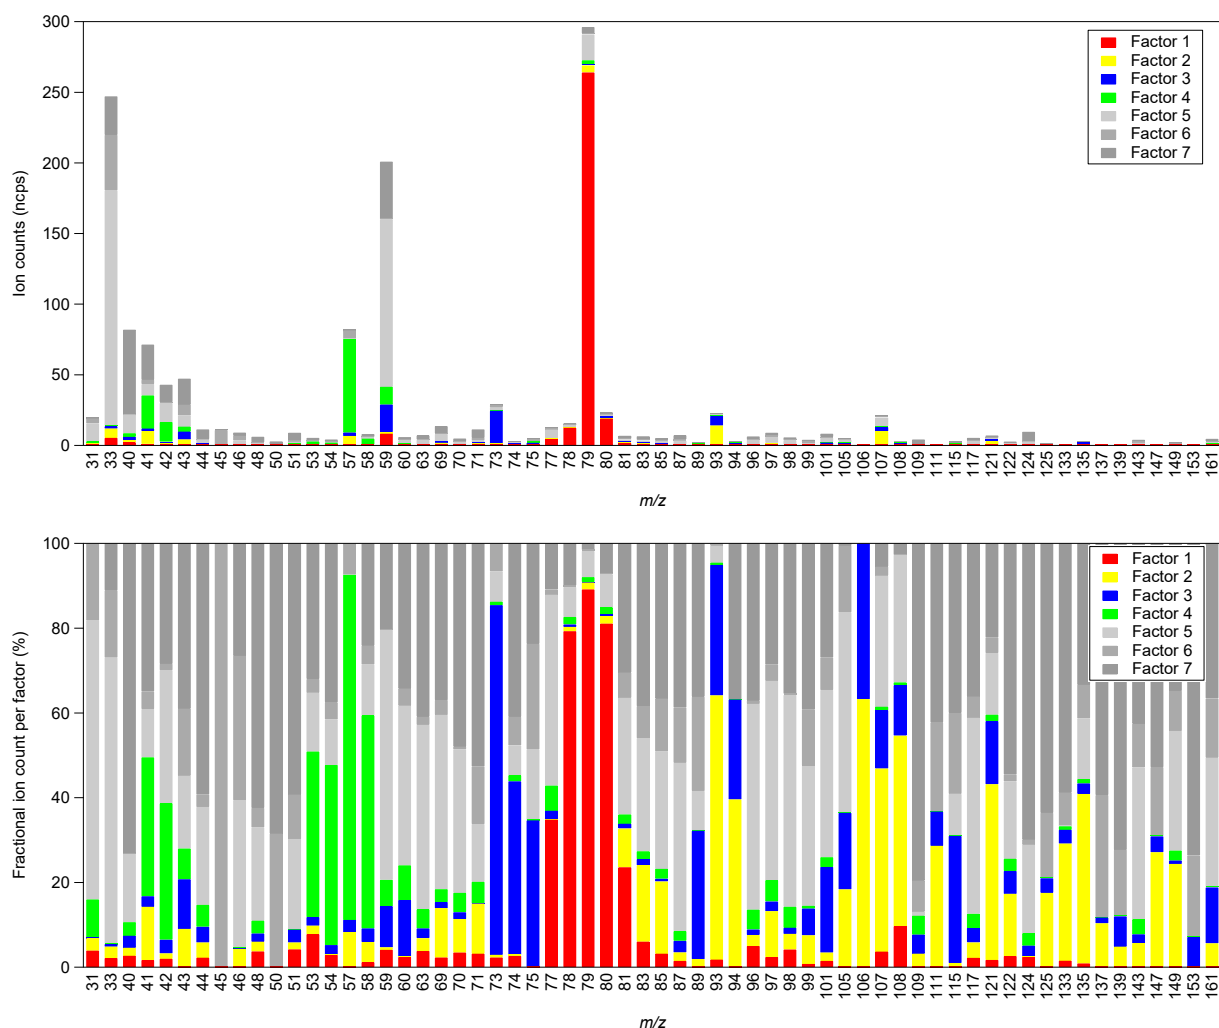

**Figure S7.** Factor contributions to total ion counts (ncps) for each  $m/z$  for the base seven-factor solution.

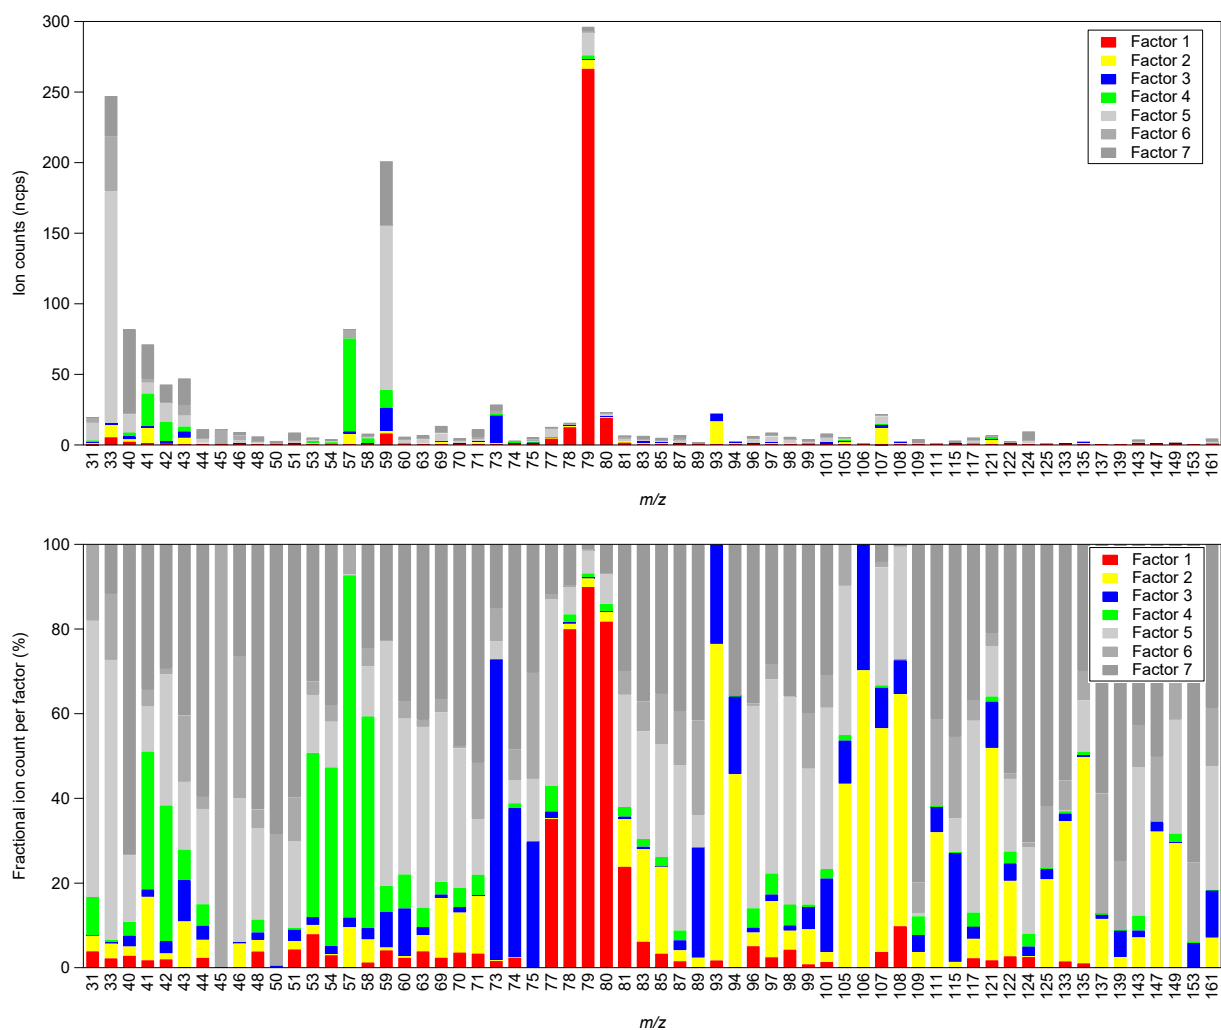

**Figure S8.** Factor contributions to total ion counts (ncps) for each  $m/z$  for the final constrained seven-factor solution.

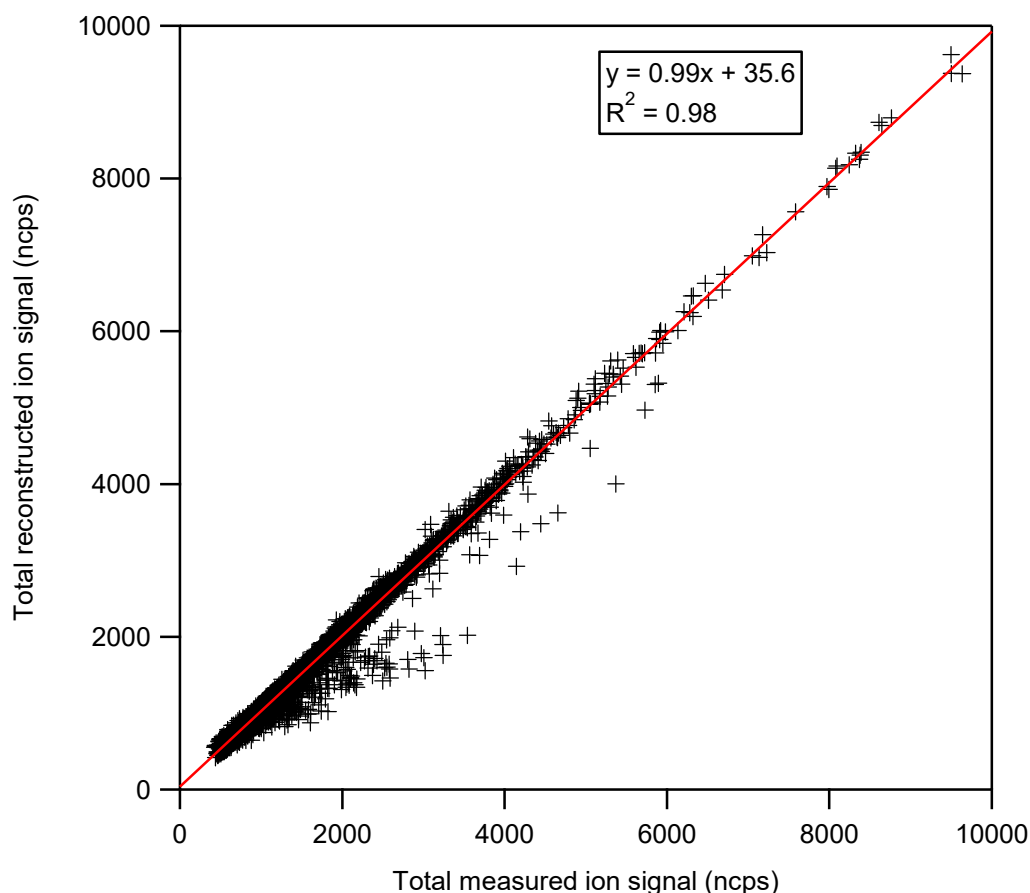

**Figure S9.** Relationship between reconstructed total ion signal and measured total ion signal for the final constrained seven-factor solution.

#### **Regional/Background factors:**

As shown below (Figure S10), the mass spectral profiles for the three factors associated with regional/background sources are characterized by signals for oxygenated VOCs. All three factors have significant contributions at  $m/z$  33, attributable predominantly to ambient methanol ( $\text{CH}_3\text{OH}\cdot\text{H}^+$ ). Factor 5 and Factor 6 differ from each other in that the former is characterized by a relatively dominant signal for acetone at  $m/z$  59 ( $\text{C}_3\text{H}_6\text{O}\cdot\text{H}^+$ ), while the latter is instead characterized by a signal for acetaldehyde at  $m/z$  45 ( $\text{C}_2\text{H}_4\text{O}\cdot\text{H}^+$ ). Factor 5 has a relatively stable persistent contribution on all five measurement days as shown in Figure S11, while Factor 6 exhibited the highest contributions on Day 2 (June 17, 2020) in the early morning. Meteorological conditions were calm the night before and into the morning of June 17, suggesting that Factor 6 is likely at least partly related to oxidation of local primary emissions in the area. Factor 7, in contrast, contains contributions from acetone and methanol, but also features high signals in the range  $m/z$  40-43, especially at  $m/z$  40. Upon examination of the raw mass spectra, the signal at  $m/z$  40 was at least partially attributable to the large shoulder from the water cluster ( $\text{H}_2\text{O}\cdot\text{H}_3\text{O}^+$ ) at  $m/z$  37. The factor contribution for Factor 7 is also temporally correlated with ambient relative humidity, as shown in Figure S12. Higher contributions for this factor are observed on those days with higher relative humidity. This relationship suggests that the response of the instrument for  $m/z$  40 is affected to some extent by ambient humidity, likely through enhanced formation of water clusters under humid conditions. None of the three background/regional factors were found to be associated with primary local emission sources in the study area.

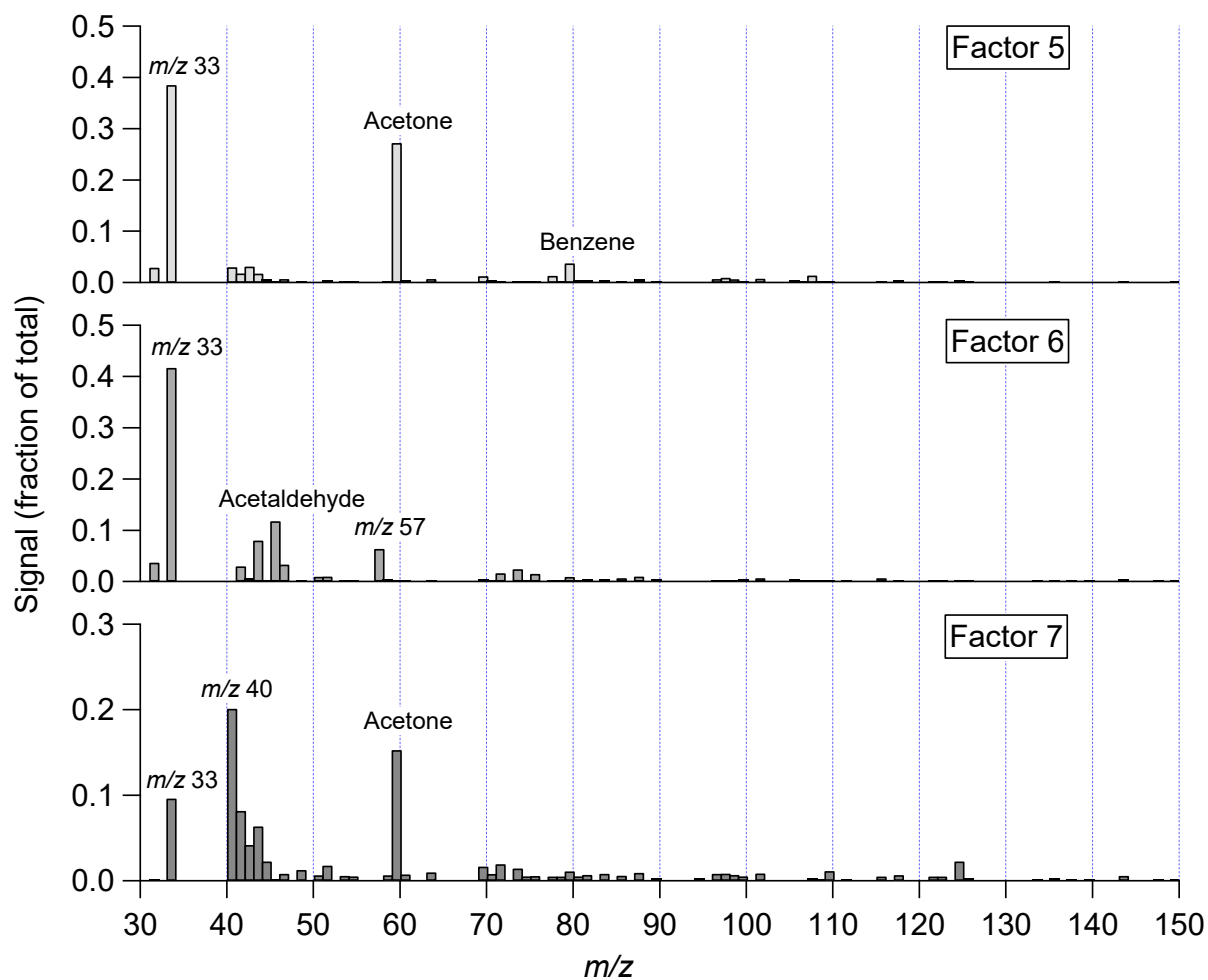

Figure S10. Mass spectral profiles for the three background factors.

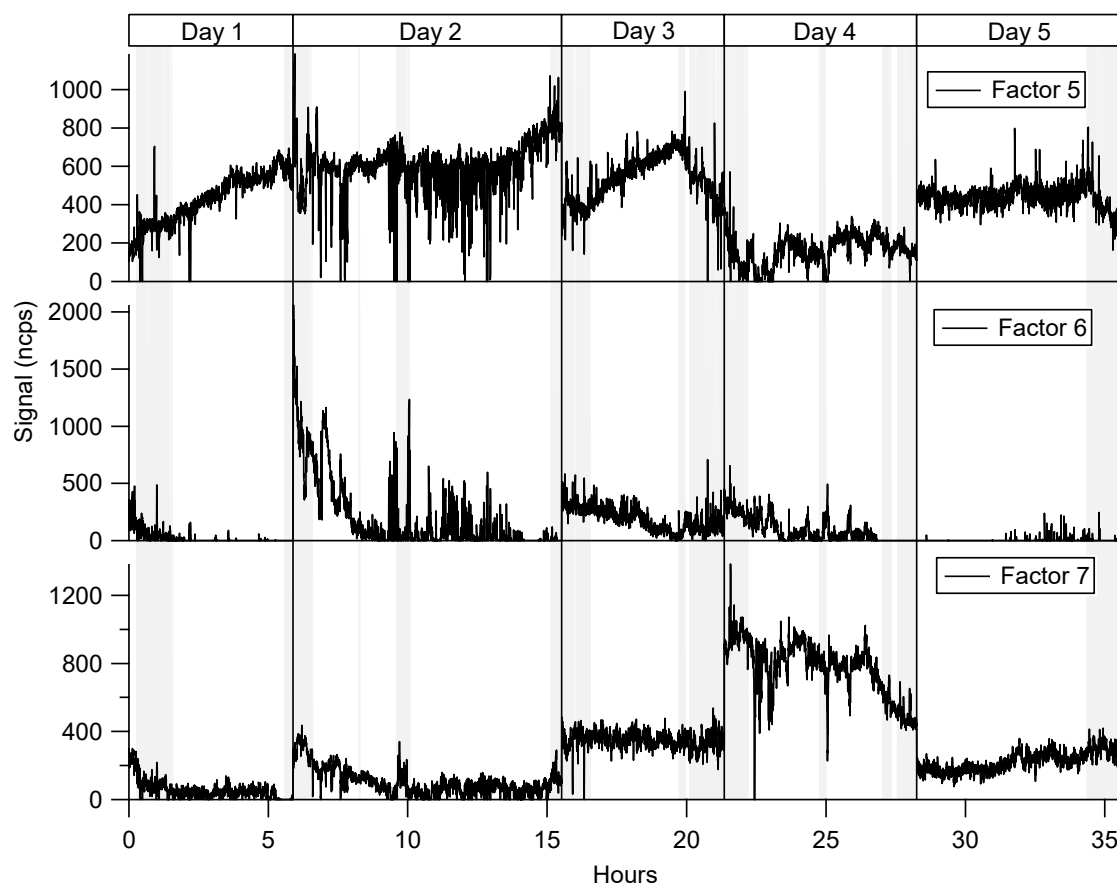

**Figure S11.** Temporality of factor contributions for the three background factors. Mobile monitoring periods are highlighted in grey and stationary monitoring periods are indicated by a white background.

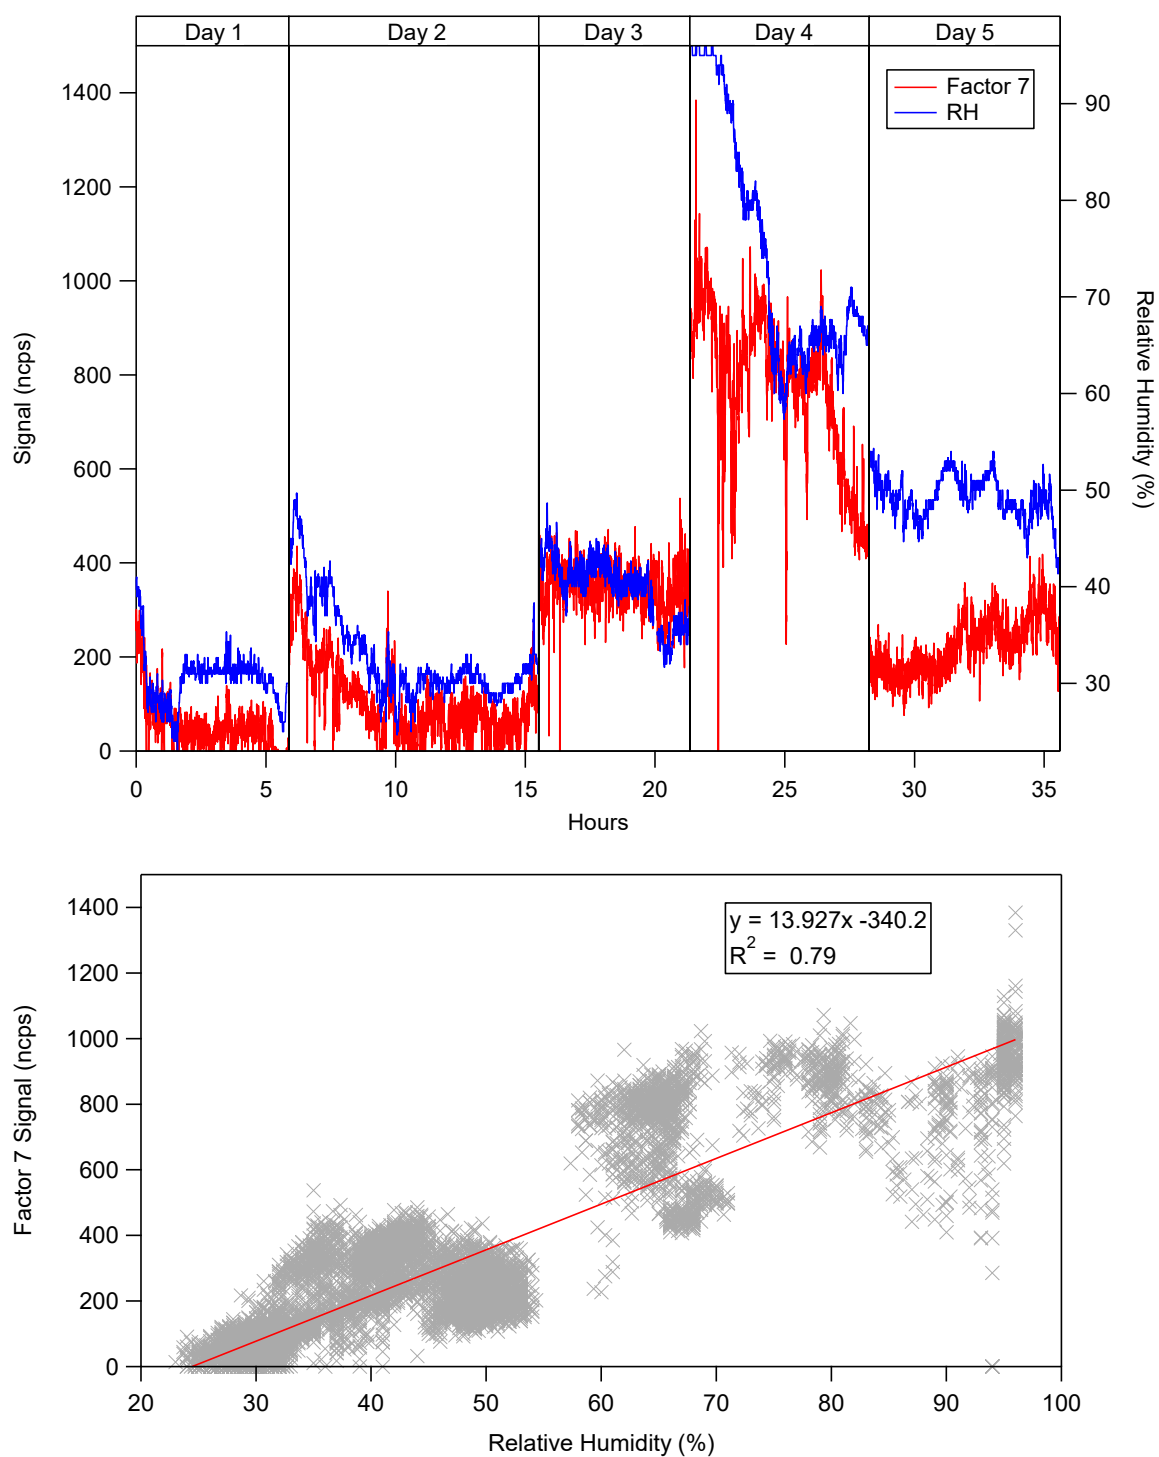

**Figure S12.** Temporality of the factor contribution for Factor 7 and ambient relative humidity (top) and linear regression of the factor contribution for Factor 7 and ambient relative humidity (bottom).

Stationary monitoring details:

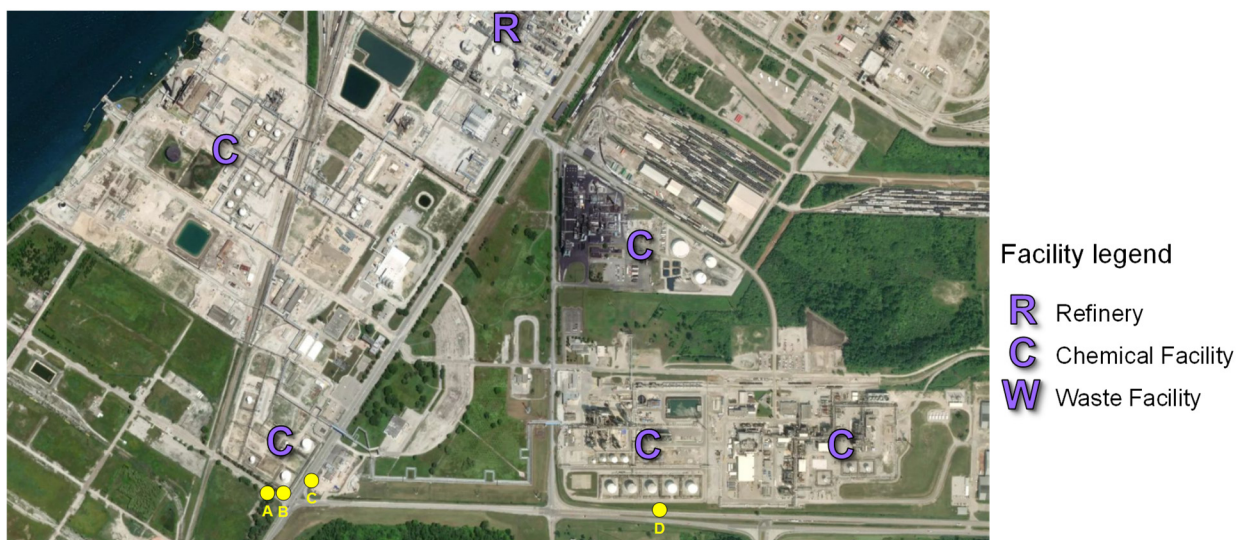

**Figure S13.** Stationary monitoring locations used on Days 1, 2 and 5.

**Table S5.** Stationary monitoring details for Days 1, 2 and 5.

| Day | Date         | Site | Start Time | End Time | Wind direction |
|-----|--------------|------|------------|----------|----------------|
| 1   | 16 June 2022 | D    | 15:30      | 19:30    | E/NE           |
| 2   | 17 June 2022 | A    | 10:11      | 12:33    | E/N            |
| 2   | 17 June 2022 | B    | 14:49      | 19:19    | N              |
| 5   | 24 June 2022 | C    | 11:06      | 17:06    | W              |

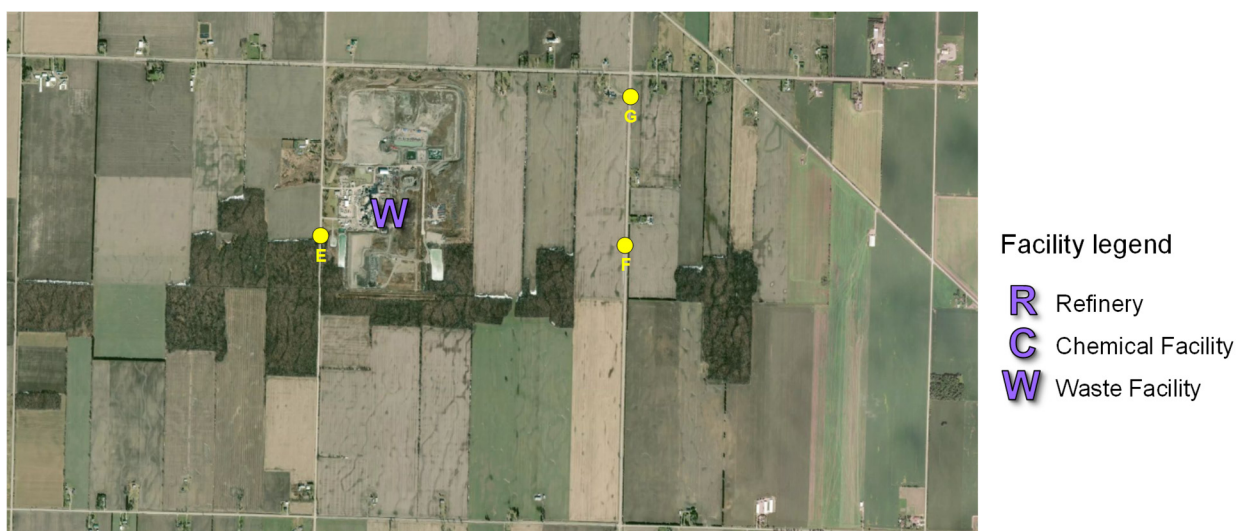

**Figure S14.** Stationary monitoring locations used on Days 3 and 4.

**Table S6.** Stationary monitoring details for Days 3 and 4.

| Day | Date         | Site | Start Time | End Time | Wind direction |
|-----|--------------|------|------------|----------|----------------|
| 3   | 18 June 2022 | E    | 10:36      | 13:36    | E/NE           |
| 4   | 23 June 2022 | F    | 12:38      | 15:08    | W              |
| 4   | 23 June 2022 | G    | 15:25      | 17:25    | SW             |

## Conditional Probability Function Analysis

The on-board wind direction data, in combination with the PTR-ToF-MS measurement data can be used to identify the direction in which major sources are located. Conditional probability function (CPF) analysis is a receptor modelling tool applied to identify the likely location of VOC (and other pollutant) sources. CPF involves combining VOC measurement data with concurrent wind data to provide directional information on point sources [3]. CPF is calculated as follows:

$$CPF = m_{\Delta\theta} / n_{\Delta\theta}$$

where  $m_{\Delta\theta}$  is the number of times wind was from a given direction and  $n_{\Delta\theta}$  is the number of times that the specified threshold value for the VOC of interest (the 75th percentile), was exceeded while wind was from that direction. Five second resolution PTR-ToF-MS and 15° wind direction resolution data were used for the calculations. Figure S15 shows CPF results for benzene and butene data collected at Site A on Day 2. The highest benzene signals were observed when wind was from the direction of a nearby benzene storage tank, located at the south end of the southwesternmost chemical facility. In contrast, the highest butene levels were observed when wind was from the north/northwest, the direction of a rubber production facility which reports emissions of butene to air [4].

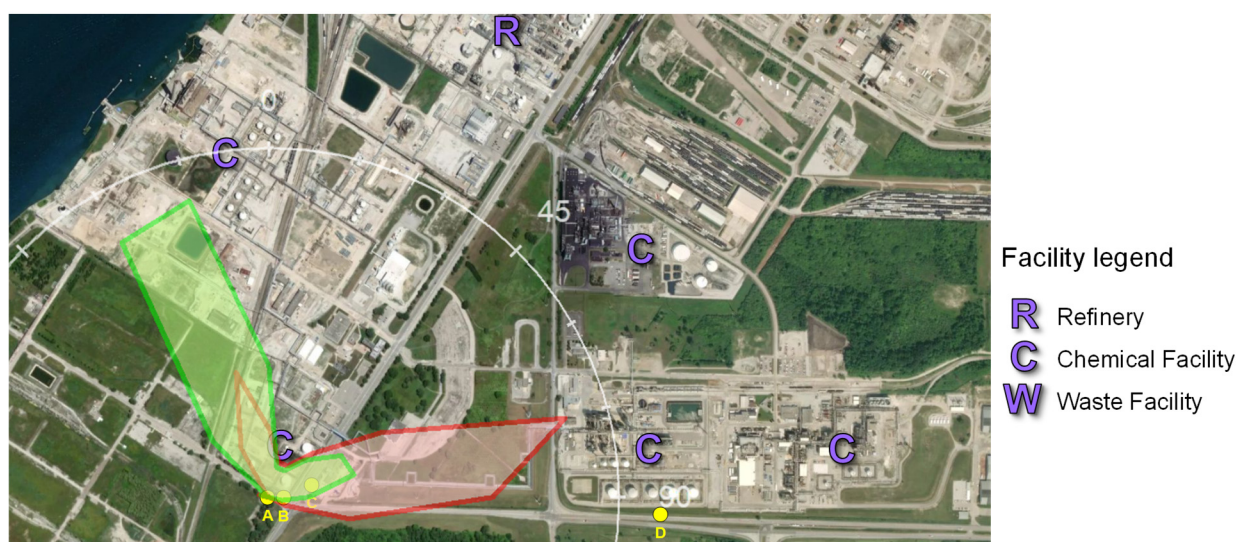

**Figure S15.** CPF plot illustrating the dependence of the highest signals (>75<sup>th</sup> percentile) measured for butene (green) and benzene (red) upon wind direction while stationary at Site A on Day 2.

Source apportionment results for individual species:

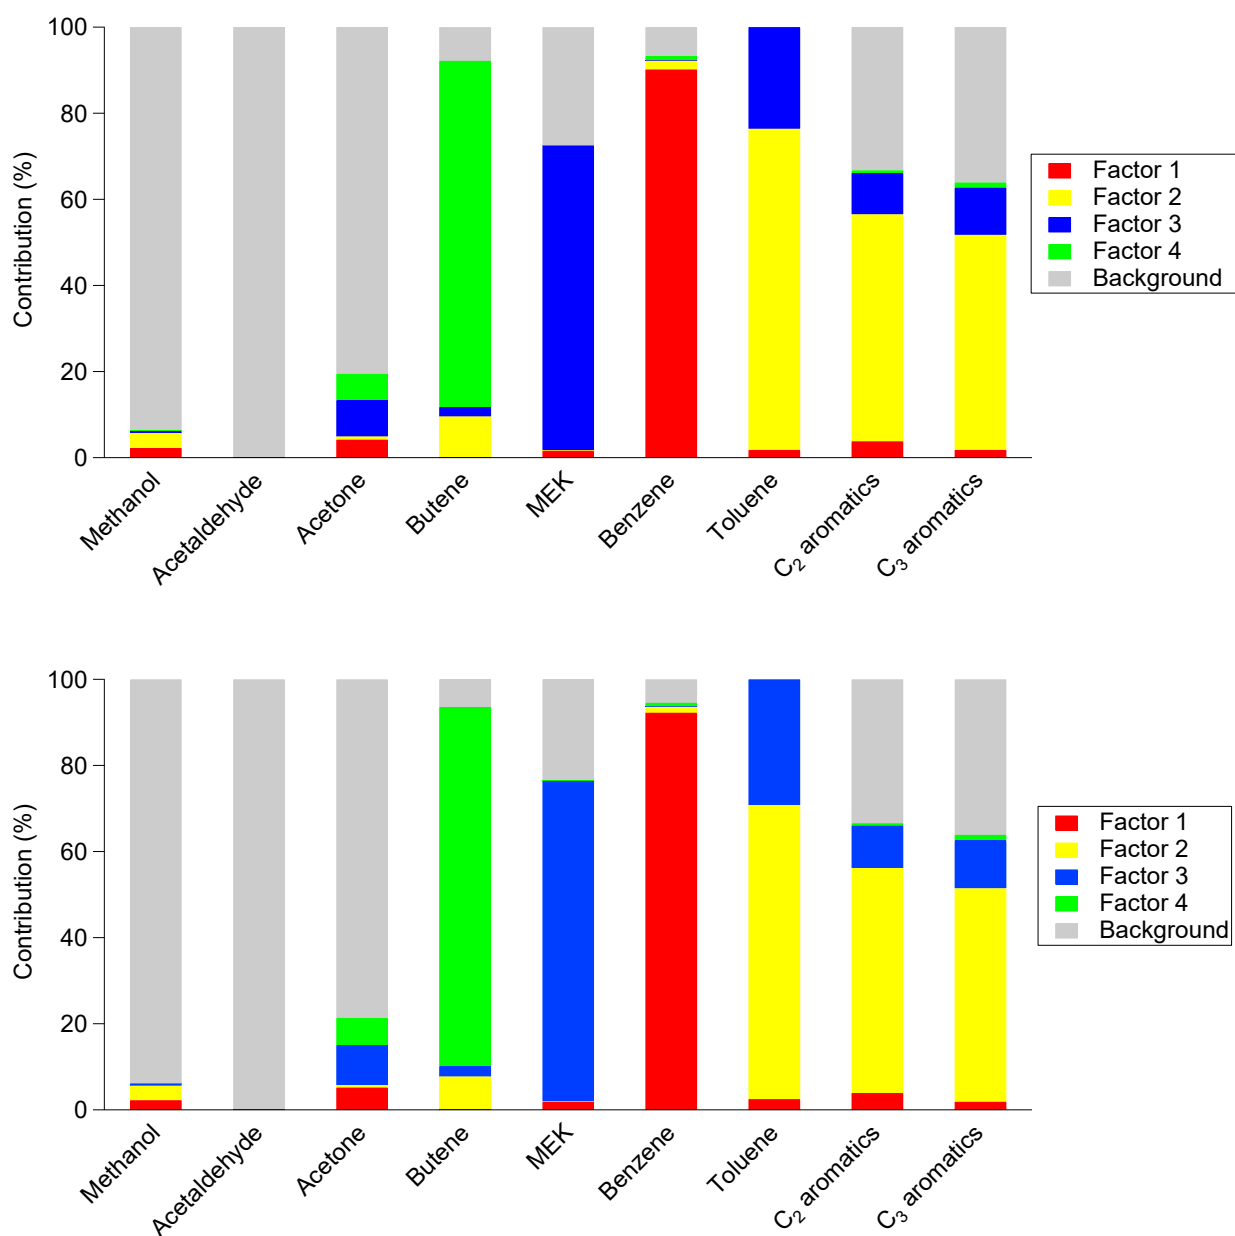

**Figure S16.** Apportionment of selected VOCs to the four local factors and the combined background factors for the entire study period (stationary and mobile) (top) and for stationary periods only (bottom).

**Table S7.** Apportionment of selected VOCs to the four local factors and the combined background factors for the entire study period (stationary and mobile).

|  | Factor 1 | Factor 2 | Factor 3 | Factor 4 | Background |
|--|----------|----------|----------|----------|------------|
|--|----------|----------|----------|----------|------------|

|                          |      |      |      |      |       |
|--------------------------|------|------|------|------|-------|
| Methanol                 | 2.2  | 3.5  | 0.4  | 0.0  | 93.9  |
| Acetaldehyde             | 0.0  | 0.0  | 0.0  | 0.0  | 100.0 |
| Acetone                  | 4.2  | 0.7  | 8.5  | 6.1  | 80.5  |
| Butene                   | 0.0  | 9.5  | 2.2  | 80.4 | 7.9   |
| MEK                      | 1.6  | 0.0  | 70.9 | 0.2  | 27.3  |
| Benzene                  | 90.1 | 2.0  | 0.0  | 1.1  | 6.7   |
| Toluene                  | 1.8  | 74.6 | 23.6 | 0.0  | 0.0   |
| C <sub>2</sub> aromatics | 3.8  | 52.7 | 9.6  | 0.6  | 33.3  |
| C <sub>3</sub> aromatics | 1.8  | 49.9 | 10.9 | 1.2  | 36.1  |

**Table S8.** Apportionment of selected VOCs to the four local factors and the combined background factors for stationary periods only.

|                          | Factor 1 | Factor 2 | Factor 3 | Factor 4 | Background |
|--------------------------|----------|----------|----------|----------|------------|
| Methanol                 | 2.2      | 3.4      | 0.4      | 0.0      | 93.9       |
| Acetaldehyde             | 0.0      | 0.0      | 0.0      | 0.0      | 100.0      |
| Acetone                  | 5.2      | 0.6      | 9.3      | 6.3      | 78.6       |
| Butene                   | 0.0      | 7.7      | 2.4      | 83.4     | 6.5        |
| MEK                      | 1.9      | 0.0      | 74.5     | 0.2      | 23.4       |
| Benzene                  | 92.2     | 1.4      | 0.0      | 0.9      | 5.5        |
| Toluene                  | 2.5      | 68.3     | 29.2     | 0.0      | 0.0        |
| C <sub>2</sub> aromatics | 3.9      | 52.2     | 9.8      | 0.6      | 33.4       |
| C <sub>3</sub> aromatics | 1.9      | 49.6     | 11.1     | 1.3      | 36.1       |

## References:

1. Norris, G.; Duvall, R.; Brown, S.; Bai, S. *EPA Positive Matrix Factorization (PMF) 5.0 Fundamentals and User Guide 2014*; U.S. Environmental Protection Agency: Washington, DC, USA, 2014.
2. Sofowote, U.M.; Su, Y.; Dabek-Zlotorzynska, E.; Rastogi, A.K.; Brook, J.; Hopke, P.K. Constraining the Factor Analytical Solutions Obtained from Multiple-Year Receptor Modeling of Ambient PM<sub>2.5</sub> Data from Five Speciation Sites in Ontario, Canada. *Atmospheric Environment* **2015**, *108*, 151–157, doi:10.1016/j.atmosenv.2015.02.045.
3. Ashbaugh, L.L.; Malm, W.C.; Sadeh, W.Z. A Residence Time Probability Analysis of Sulfur Concentrations at Grand Canyon National Park. *Atmospheric Environment (1967)* **1985**, *19*, 1263–1270, doi:http://dx.doi.org/10.1016/0004-6981(85)90256-2.
4. ECCC Environment and Climate Change Canada National Pollutant Release Inventory. 2019. Available online: <https://www.canada.ca/en/environment-climate-change/services/national-pollutant-release-inventory/tools-resources-data/access.html> (accessed on 13 April 2021).
